# Supplementary material for: “Don’t eat me/eat me”-combined apoptotic body analogues for efficient targeted therapy of triple-negative breast cancer
Source: Royal Society of Chemistry journal article supplement (doi:10.1039/d1tb01116b), 2021-01-01
Supplement: d1tb01116b1.pdf [file d1tb01116b1.pdf]

## Supporting Information

### **“Don’t eat me/eat me”-combined apoptotic body analogues for efficient targeted therapy of triple-negative breast cancer**

*Kailong Zhang,<sup>\*a</sup> Huanru Fu,<sup>a</sup> Chao Xing,<sup>b</sup> Yi Luo,<sup>a</sup> Fangfang Cheng,<sup>a</sup> Qiang Fu,<sup>a</sup> Yujie Huang<sup>a</sup> and Longxin Qiu<sup>a</sup>*

<sup>a</sup> Fujian Provincial Key Laboratory for the Prevention and Control of Animal Infectious Diseases and Biotechnology, Fujian Province Universities Key Laboratory of Preventive Veterinary Medicine and Biotechnology (Longyan University), School of Life Sciences, Longyan University, Longyan 364012, P. R. China. E-mail: klzhang@lyun.edu.cn

<sup>b</sup> Fujian Key Laboratory of Functional Marine Sensing Materials, Center for Advanced Marine Materials and Smart Sensors, Minjiang University, Fuzhou 350108, P. R. China.

Supporting Figures

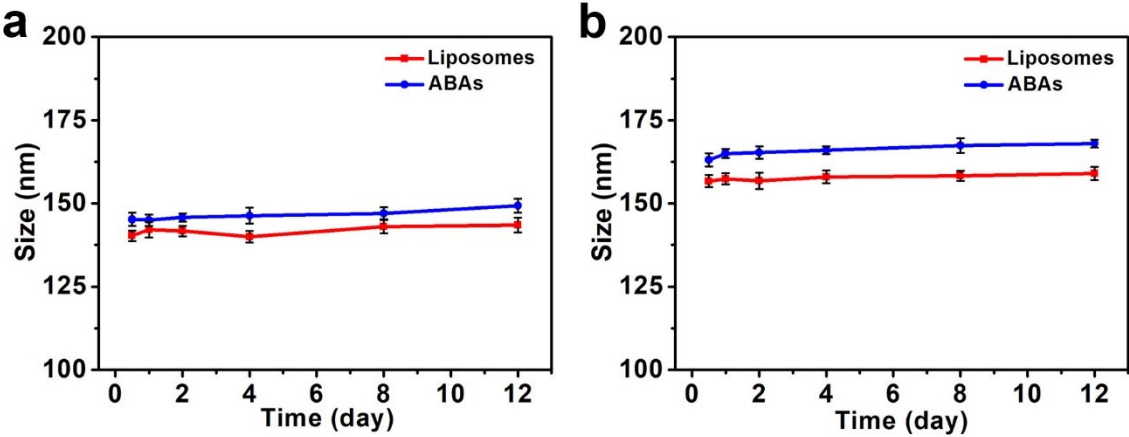

**Fig. S1** Hydrodynamic diameter distributions of ABAs and liposomes in (a) PBS (pH = 7.4) and (b) 20% fetal bovine serum (FBS) over 12 days.

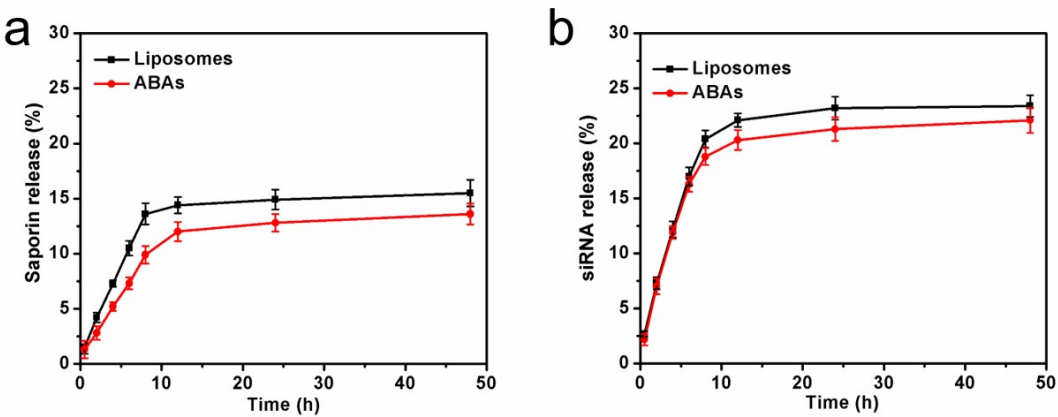

**Fig. S2** *In vitro* release profiles of (a) saporin and (b) anti-Twist siRNA in FBS (pH 7.4) at 37 °C.

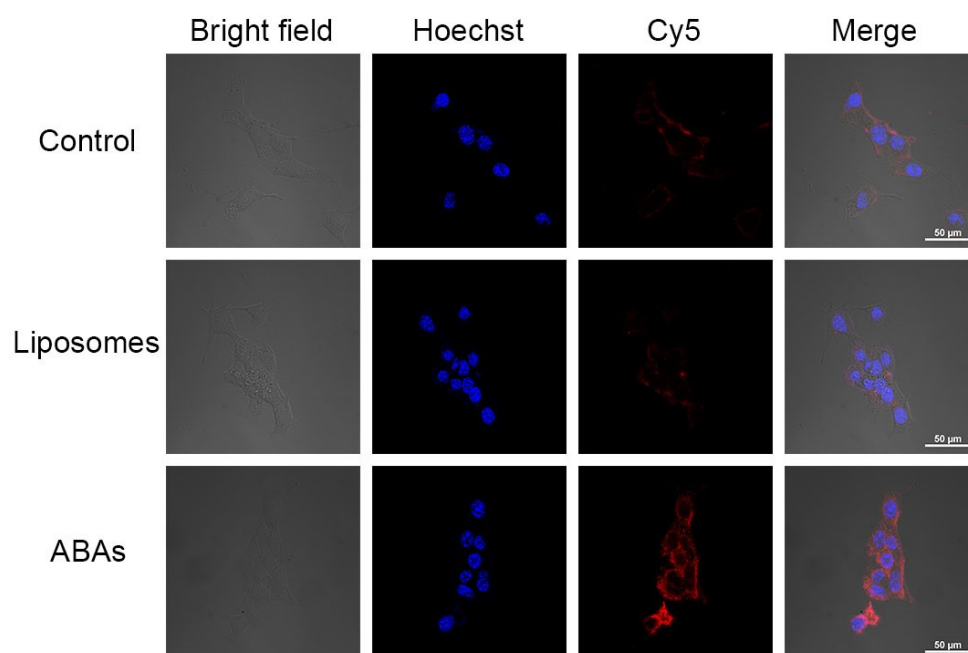

**Fig. S3** *In vitro* fluorescence imaging of liposomes and ABAs in 4T1 cancer cells after 4 h incubation. The nucleus was stained with Hoechst 33342 (blue).

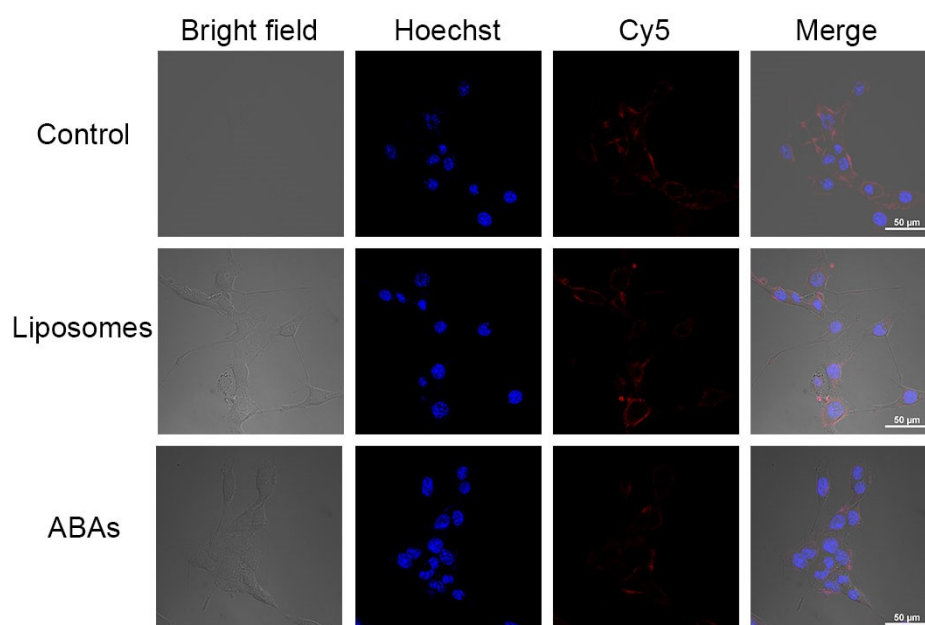

**Fig. S4** *In vitro* fluorescence imaging of liposomes and ABAs in MCF-7 cells after 4 h incubation. The nucleus was stained with Hoechst 33342 (blue).

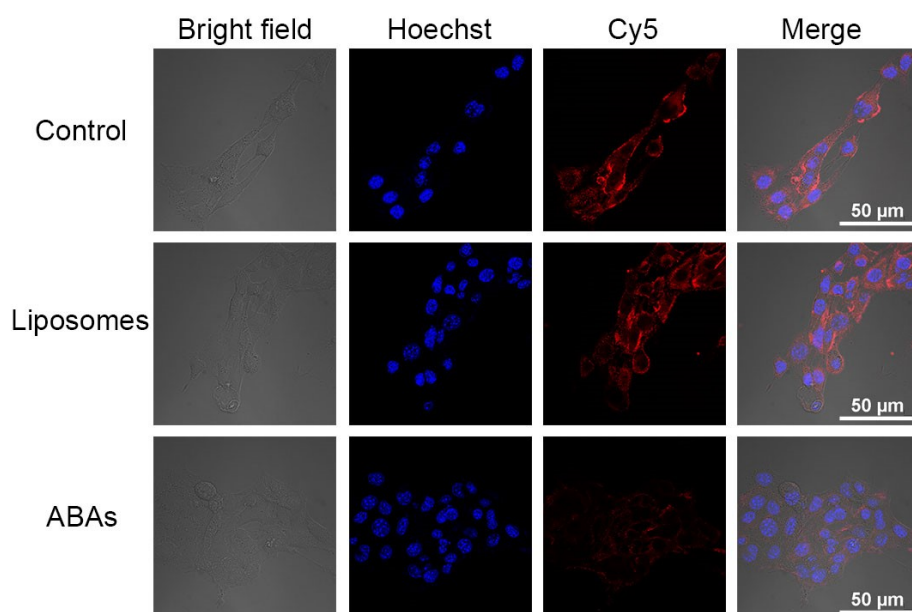

**Fig. S5** *In vitro* fluorescence imaging of liposomes and ABAs in RAW264.7 cells after 4 h incubation.

The nucleus was stained with Hoechst 33342 (blue).

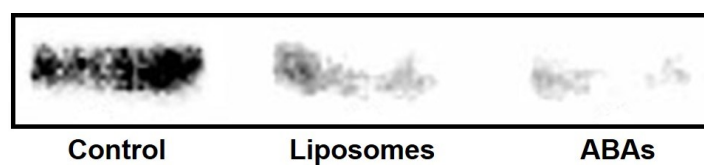

**Fig. S6** Western blot assay of Twist protein expression in 4T1 cells after 24 h incubation with free anti-Twist siRNA (as control), liposomes, and ABAs.

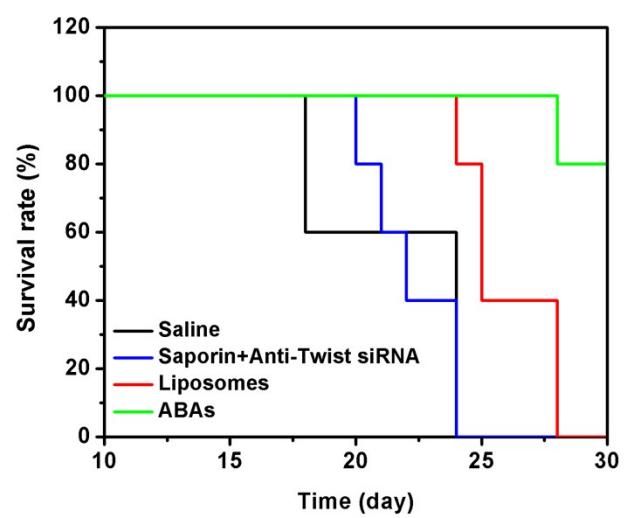

**Fig. S7** The survival rate of mice after different treatments ( $n = 5$ ).
